# Supplementary material for: Facile fabrication of narrowly-distributed polymeric micelles via host–guest inclusion complexation of hyperbranched polymers and cyclodextrin and its two-dimensional self-assembly
Source: Royal Society of Chemistry journal article supplement (doi:10.1039/c002463e), 2010-01-01
Supplement: c002463e.pdf [file c002463e.pdf]

## Supporting Information

### Facile Fabrication of Narrow Distribution Polymeric Micelles via Host-Guest Inclusion Complexation of Hyperbranched polymers and Cyclodextrin and its Two-Dimensional self-assembly

*Xiaoyi Sun, Wei Huang, Yongfeng Zhou\* and Deyue Yan*

School of Chemistry and Chemical Engineering, State Key Laboratory of Metal Matrix  
Composites, Shanghai Jiao Tong University, 800 Dongchuan Road, Shanghai 200240, China

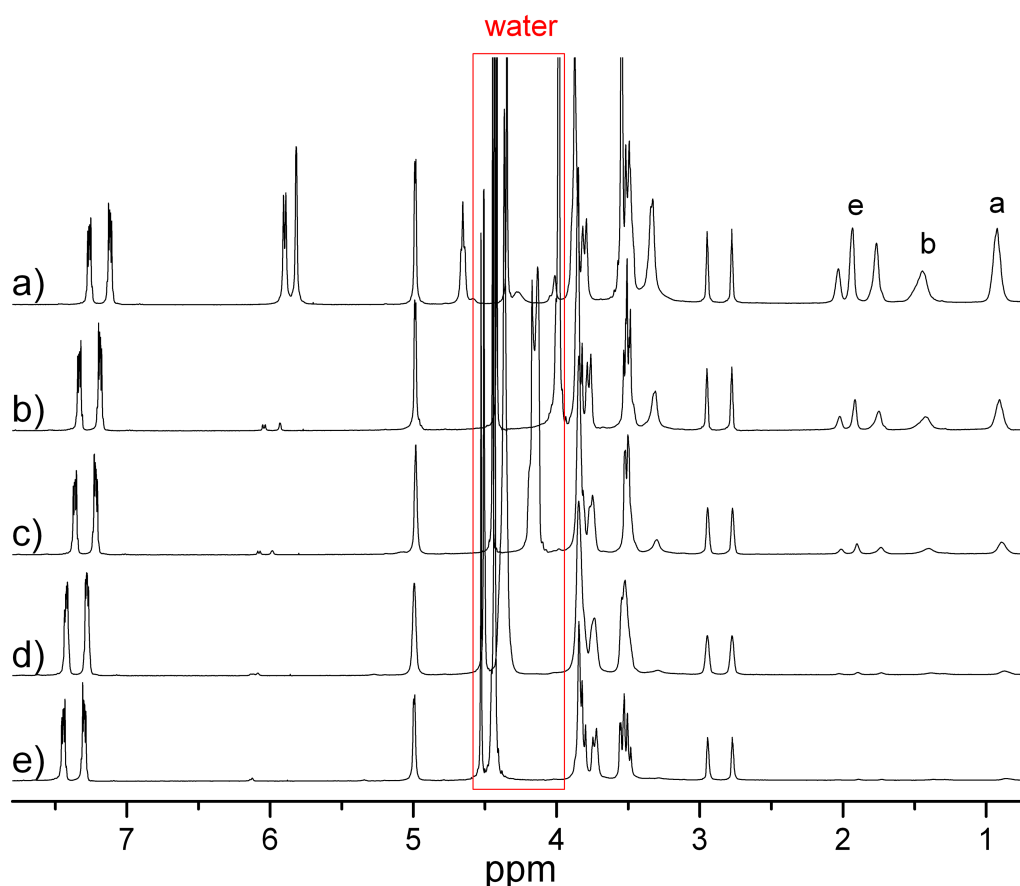

Fig. S1  $^1\text{H}$  NMR spectra of HBPO-AD/ $\beta$ -CD micelles in DMF- $d_7$  and  $\text{D}_2\text{O}$  mixture (the molar ratio of AD/ $\beta$ -CD is 1:1).  $\text{D}_2\text{O}$  contents (vol %): (a) 0, (b) 9, (c) 16.7, (d) 28.6, and (e) 37.5. The frame represents the water signals. There are two kinds of water signals in the spectra. One is from the added  $\text{D}_2\text{O}$ ; the other is from the potassium hydrogen phthalate/ $\text{D}_2\text{O}$  solution in the sealed inner tube as an external standard.

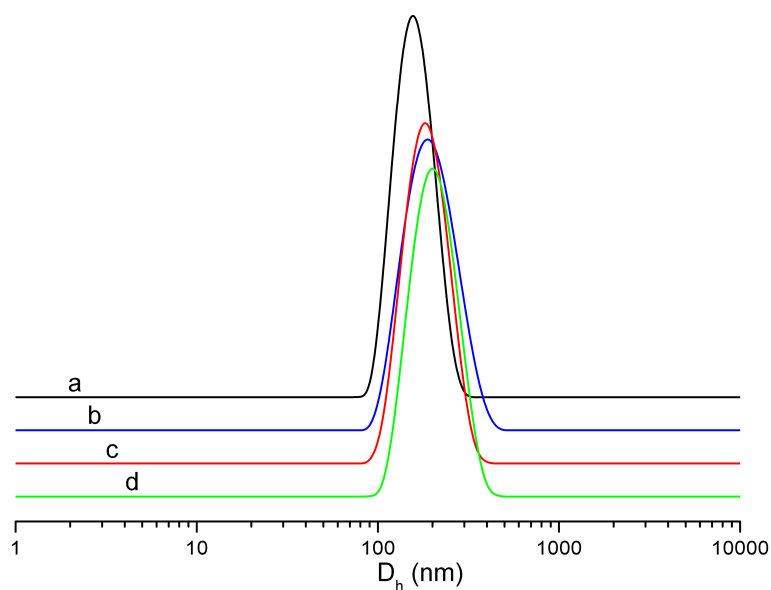

Fig. S2 Typical intensity-weighted size distribution of HBPO-AD/β-CD micellar solutions at AD/β-CD molar ratio (a) 1:0.25, (b) 1:0.5, (c) 1:1 and (d) 1:2. The intensity-weighted size distribution is obtained from Malvern Zetasizer software using non-negative least squares (NNLS) method.

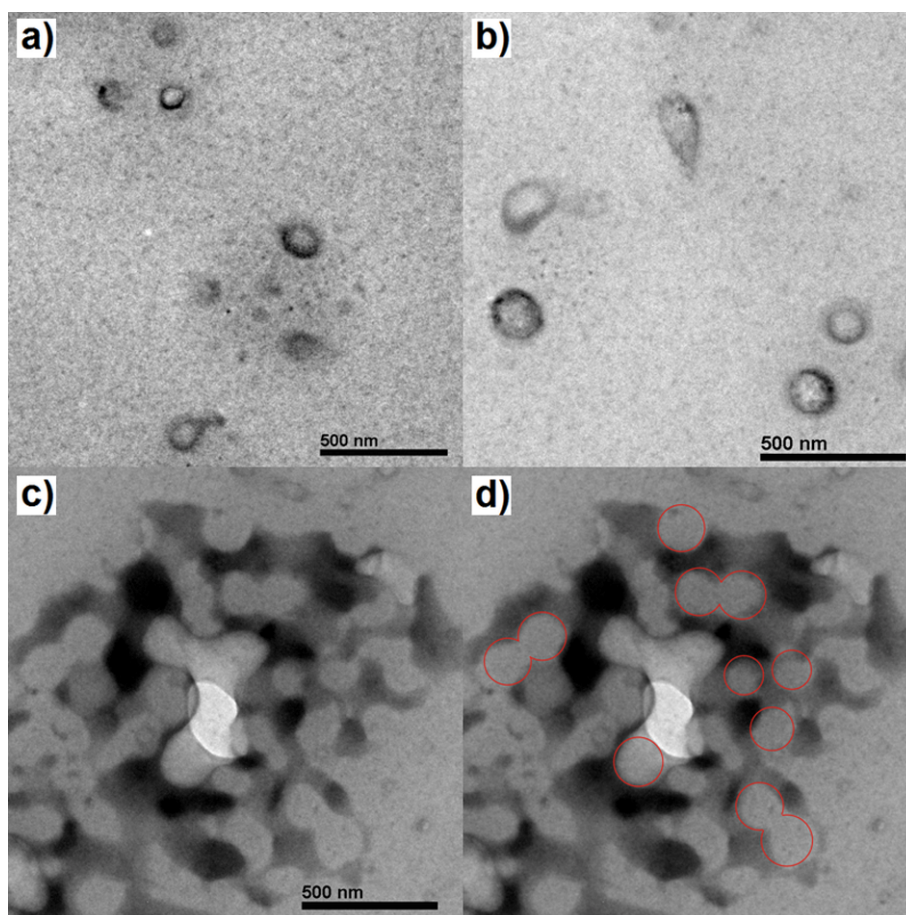

Fig. S3 TEM images (a-c) of HBPO-AD/β-CD micellar solution after staining in iodine vapor. The molar ratio of AD/β-CD is 1:1. The circles in Fig. S3d show the profile of the micelles in Fig. S3c

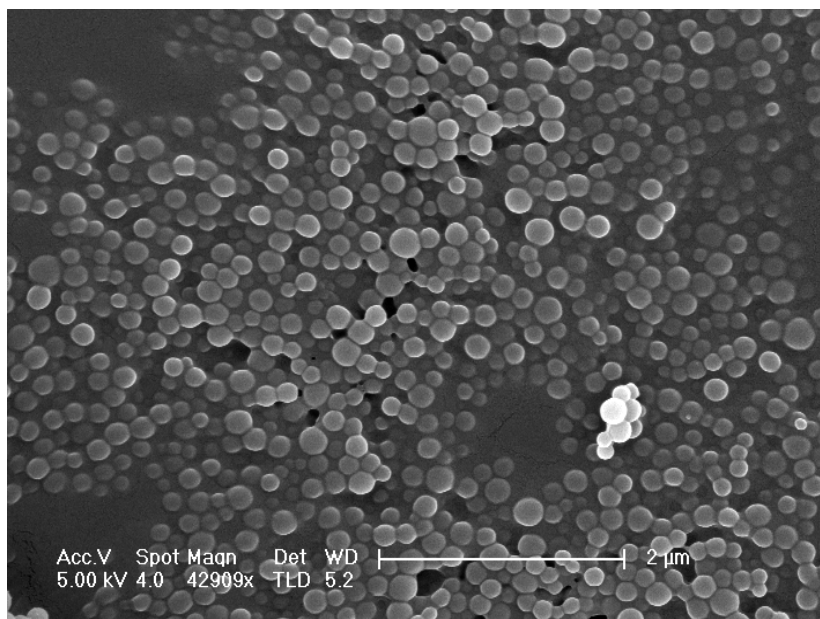

Fig. S4 SEM images of HBPO-AD/ $\beta$ -CD micelles prepared under freeze-drying condition. The molar ratio of AD/ $\beta$ -CD is 1:1, and the concentration is 1.0 mg mL<sup>-1</sup>.

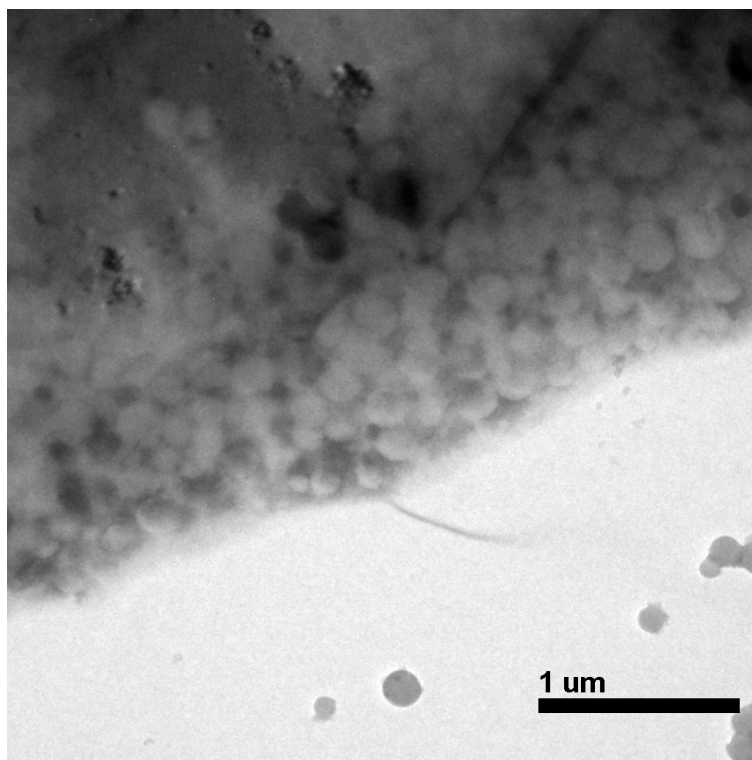

Fig. S5 TEM images of 2D sheets obtained by annealing the HBPO-AD/ $\beta$ -CD micellar solution at 75 °C for 48 h. The molar ratio of AD/ $\beta$ -CD is 1:1, and the concentration is 1.0 mg mL<sup>-1</sup>.

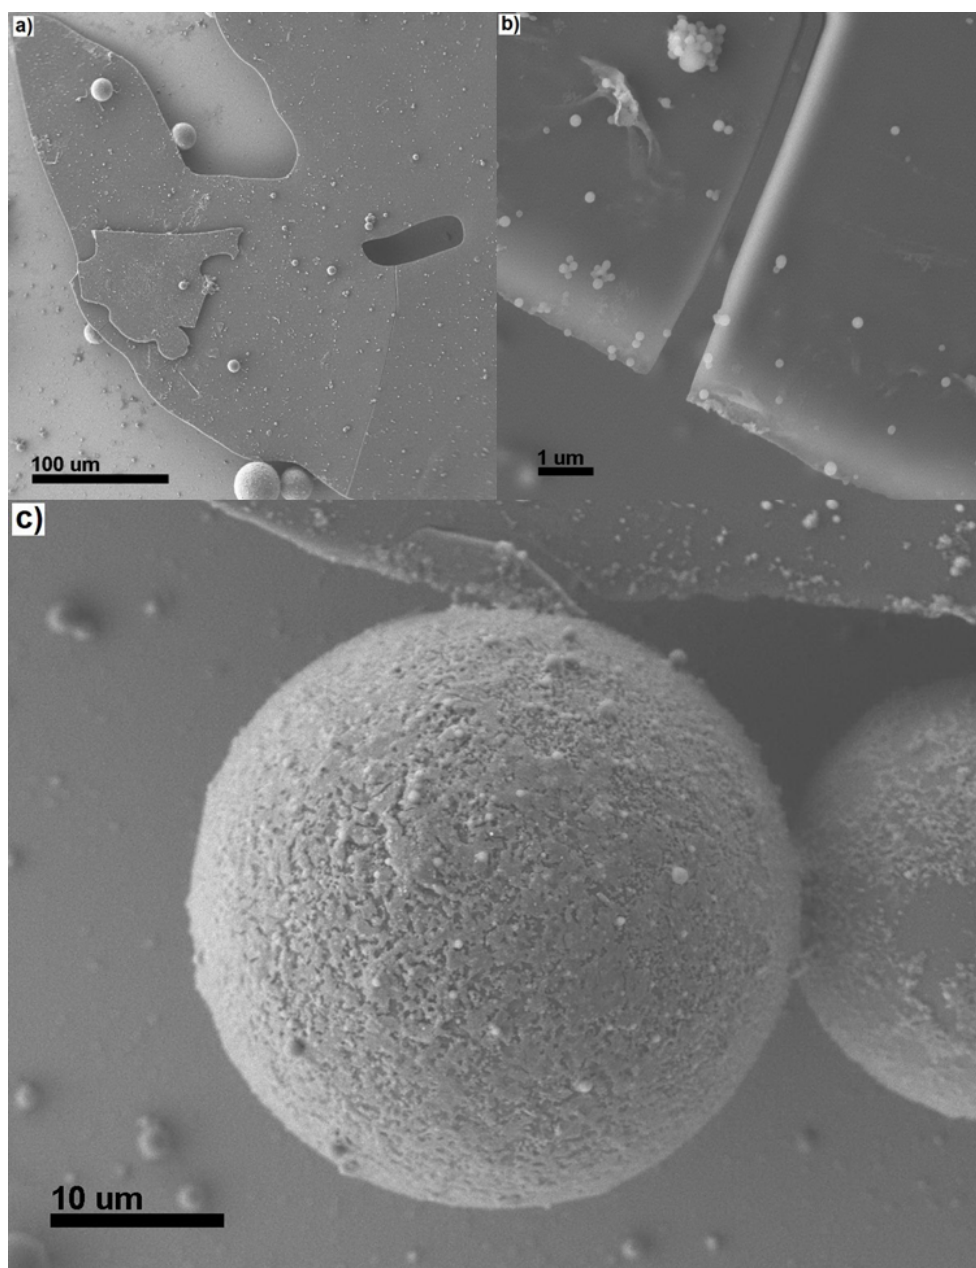

Fig. S6 SEM images of 2D sheets with smooth surface obtained by annealing the HBPO-AD/ $\beta$ -CD micellar solution at 75 °C for 48 h. The molar ratio of AD/ $\beta$ -CD is 1:1, and the concentration is 1.0 mg mL<sup>-1</sup>.

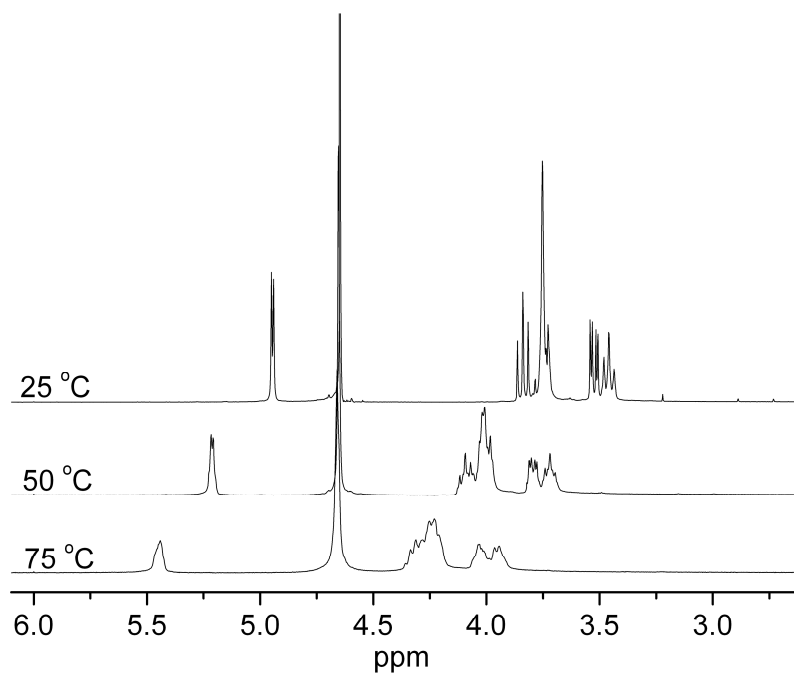

Fig. S7  $^1\text{H}$  NMR spectra of HBPO-AD/ $\beta$ -CD micelles in  $\text{D}_2\text{O}$  solution at different temperature. The molar ratio of AD/ $\beta$ -CD is 1:1.

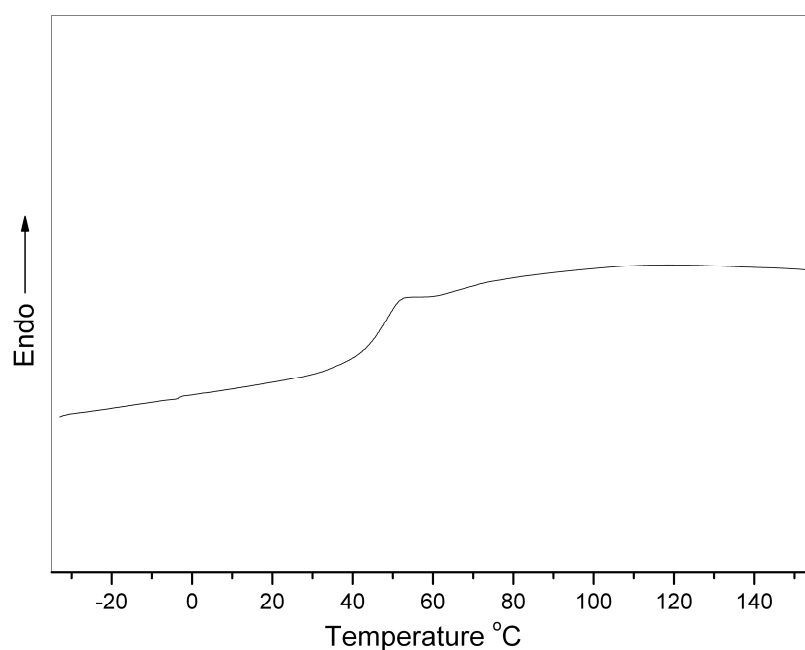

Fig. S8 DSC curve in the second heating scan for HBPO-AD.  $T_g$  was determined using a TA instruments Q2000 differential scanning calorimeter in a dry nitrogen atmosphere. The sample was heated from  $-30$  to  $150$   $^{\circ}\text{C}$  at a rate of  $20$   $^{\circ}\text{C}/\text{min}$ . The second heating curve was recorded and  $T_g$  was measured using TA software.
